# Supplementary material for: Coexistence of ferromagnetism and superconductivity in iron based pnictides: a time resolved magnetooptical study
Source: PubMed Central journal article supplement — Sci Rep. 2015 Jan 13;5:7754. doi: 10.1038/srep07754 (PMC4291556; doi:10.1038/srep07754), 2015-01-13
Supplement: srep07754-s1.pdf [file srep07754-s1.pdf]

# Coexistence of ferromagnetism and superconductivity in iron based pnictides: a time resolved magneto-optical study (supplemental information)

A. Pogrebna,<sup>1,2</sup> T. Mertelj,<sup>1</sup> N. Vujičić,<sup>1,3</sup> G. Cao,<sup>4</sup> Z. A. Xu,<sup>4</sup> and D. Mihailovic<sup>1,5</sup>

<sup>1</sup> *Complex Matter Dept., Jozef Stefan Institute, Jamova 39, SI-1000 Ljubljana, Slovenia*

<sup>2</sup> *Jožef Stefan International Postgraduate School, Jamova 39, SI-1000 Ljubljana, Slovenia*

<sup>3</sup> *Institute of Physics, Bijenička 46, HR-10000 Zagreb, Croatia*

<sup>4</sup> *Department of Physics, Zhejiang University, Hangzhou 310027, People's Republic of China*

<sup>5</sup> *CENN Nanocenter, Jamova 39, SI-1000 Ljubljana, Slovenia*

## Contents

|                                                               |   |
|---------------------------------------------------------------|---|
| <b>Optical response in the conical helimagnetic state</b>     | 1 |
| <b>Optical response in the canted antiferromagnetic state</b> | 2 |
| <b>References</b>                                             | 2 |

### Optical response in the conical helimagnetic state

Assuming that within a single plane  $\text{Eu}^{2+}$  spins are ordered ferromagnetically Eq. (1) can be applied to each plane separately. Neglecting for simplicity the crystallographic details and assuming a conical helimagnetic phase with  $\mathbf{M} = M_0[\cos(q_0 z) \sin(\theta), \sin(q_0 z) \sin(\theta), \cos(\theta)]$ , where  $q_0$  represents the helix propagation wavevector and  $\theta$  the local magnetization angle relative to the  $c$ -axis, we introduce following Ref. [1] a local coordinate system,

$$\begin{aligned}\hat{x}' &= [\hat{x} \cos(q_0 z) + \hat{y} \sin(q_0 z)] \cos(\theta) - \hat{z} \sin(\theta), \\ \hat{y}' &= -\hat{x} \sin(q_0 z) + \hat{y} \cos(q_0 z), \\ \hat{z}' &= [\hat{x} \cos(q_0 z) + \hat{y} \sin(q_0 z)] \sin(\theta) + \hat{z} \cos(\theta).\end{aligned}\quad (\text{S1})$$

Here  $\hat{e}_i$  represents the Cartesian unit vectors. The modes of a spin-operators linearized Hamiltonian are then represented by,[2]

$$\begin{aligned}\delta M_{x'}(z) &\propto \sum_m s_{x'}(\mathbf{q} + m q_0 \hat{z}) e^{i[(\mathbf{q} + m q_0 \hat{z}) \cdot \mathbf{r} - \omega(\mathbf{q})t]}, \\ \delta M_{y'}(z) &\propto \sum_m s_{y'}(\mathbf{q} + m q_0 \hat{z}) e^{i[(\mathbf{q} + m q_0 \hat{z}) \cdot \mathbf{r} - \omega(\mathbf{q})t]},\end{aligned}\quad (\text{S2})$$

where  $m$  are integers and  $s_{i'}(\mathbf{q})$  and  $\omega(\mathbf{q})$  depend on the particular choice of Hamiltonian.[1, 2] Here nonzero  $m$  terms need to be introduced because in the presence of an in-plane external magnetic field higher harmonics appear in the modulation.[2] An in-plane anisotropy also introduces higher harmonic terms. Transforming back to the crystal coordinate system and taking into account only the oscillating part by omitting the terms containing  $\delta M_{z'}$  we obtain:

$$\begin{aligned}\delta M_x(z) &\propto e^{-i\omega(\mathbf{q})t} \cos(\theta) \left[ \cos(q_0 \hat{z}) \sum_m s_{x'}(\mathbf{q} + m q_0 \hat{z}) e^{i(\mathbf{q} + m q_0 \hat{z}) \cdot \mathbf{r}} - \sin(q_0 \hat{z}) \sum_m s_{y'}(\mathbf{q} + m q_0 \hat{z}) e^{i(\mathbf{q} + m q_0 \hat{z}) \cdot \mathbf{r}} \right], \\ \delta M_y(z) &\propto e^{-i\omega(\mathbf{q})t} \cos(\theta) \left[ \sin(q_0 \hat{z}) \sum_m s_{x'}(\mathbf{q} + m q_0 \hat{z}) e^{i(\mathbf{q} + m q_0 \hat{z}) \cdot \mathbf{r}} + \cos(q_0 \hat{z}) \sum_m s_{y'}(\mathbf{q} + m q_0 \hat{z}) e^{i(\mathbf{q} + m q_0 \hat{z}) \cdot \mathbf{r}} \right], \\ \delta M_z(z) &\propto e^{-i\omega(\mathbf{q})t} \sin(\theta) \sum_m s_{x'}(\mathbf{q} + m q_0 \hat{z}) e^{i(\mathbf{q} + m q_0 \hat{z}) \cdot \mathbf{r}}.\end{aligned}\quad (\text{S3})$$

$\langle M_i \delta M_i \rangle$  therefore contains terms:

$$\begin{aligned}
\langle M_x \delta M_x \rangle &\propto \cos^2(\theta) \sum_m s_{x'}(q_z \hat{z} + m q_0 \hat{z}) \langle \cos^2(q_0 z) e^{i(q_z + m q_0)z} \rangle, \\
\langle M_y \delta M_y \rangle &\propto \cos^2(\theta) \sum_m s_{x'}(q_z \hat{z} + m q_0 \hat{z}) \langle \sin^2(q_0 z) e^{i(q_z + m q_0)z} \rangle, \\
\langle M_z \delta M_z \rangle &\propto \cos(\theta) \sin(\theta) \sum_m s_{x'}(q_z \hat{z} + m q_0 \hat{z}) \langle e^{i(q_z + m q_0)z} \rangle.
\end{aligned} \tag{S4}$$

Here  $\langle \rangle$  represents the average over  $\text{Eu}^{2+}$  planes.  $\langle M_x \delta M_x \rangle$  and  $\langle M_y \delta M_y \rangle$  are nonzero only when (i)  $q_z + m q_0 = \pm 2q_0$  or (ii)  $q_z + m q_0 = 0$ . In case (i)  $\langle M_x \delta M_x \rangle = -\langle M_y \delta M_y \rangle$  leading to an anisotropic in-plane response while in case (ii)  $\langle M_x \delta M_x \rangle = \langle M_y \delta M_y \rangle$  leading to the isotropic response. The frequencies present in the in-plane isotropic response are therefore  $\omega(0 + m q_0)$ .

Due to terms  $\langle e^{i(q_z + m q_0)z} \rangle$  the term  $\langle M_z \delta M_z \rangle$  also leads to isotropic response at frequencies  $\omega(0 + m q_0)$ .

The TR-MOKE response, on the other hand, is determined by  $\delta \epsilon_{xy} \propto i \langle \delta M_z \rangle$  and contains terms  $\langle e^{i(q_z + m q_0)z} \rangle$  that are nonzero for  $q_z + m q_0 = 0$ , which is identical to (ii). In a single magnetic domain sample the in-plane isotropic modes should therefore appear also in the  $c$ -axis TR-MOKE response.

#### Optical response in the canted antiferromagnetic state

For convenience we switch to the standard definition of the order parameters in weak ferromagnets.[3] Assuming that the magnetization at  $H = 0$  is oriented along the  $c$  axis, the total magnetization displacement,  $\delta \mathbf{M}$ , of the quasi-FM mode would lie on an ellipse perpendicular to  $\mathbf{M}$  with the AFM vector displacements,  $\delta \mathbf{L}$ , linear along  $\mathbf{M}$ , [4] while for the quasi-AFM mode  $\delta \mathbf{M}$  would be linear along  $\mathbf{M}$  and  $\delta \mathbf{L}$  on an ellipse lying in the  $xy$ -plane. Looking at the symmetric part of the dielectric tensor for the orthorhombic case following Iida *et al.*[4] and assuming  $\mathbf{L} \parallel a$  and  $\mathbf{H} \parallel b$  it follows:

$$\begin{aligned}
\epsilon_{ii} = &\epsilon_{0,ii} + a_{iizz} M_z^2 + a_{iiyy} M_y^2 + \\
&+ b_{iixx} L_x^2 + c_{iixx} M_z L_x.
\end{aligned} \tag{S5}$$

Here the terms  $c_{iixx} M_z L_x$  are due to the Dzyaloshinskii-Moriya interaction and are incompatible with our samples crystallographic structure ( $Fm\bar{3}m$ ).[5] The modulation of the dielectric tensor obtained from (S5) to the linear order in displacements is given by:

$$\begin{aligned}
\delta \epsilon_{ii} = &2a_{iizz} M_z \delta M_z + 2a_{iiyy} M_y \delta M_y + \\
&+ 2b_{iixx} L_x \delta L_x + c_{iixx} (L_x \delta M_z + M_z \delta L_x).
\end{aligned} \tag{S6}$$

For both magnetic modes the nearly-isotropic response can come from the term  $2a_{iizz} M_z \delta M_z$  only since  $a_{xxxx} \sim a_{yyyy}$  due to the small orthorhombicity. The nearly isotropic in-plane response can therefore only be associated with  $\delta M_z$ . Since both modes contribute to  $\delta M_z$  at a finite in-plane magnetic field, when  $\mathbf{M}$  is tilted away from the  $c$ -axis along the magnetic field, both should occur concurrently in the transient reflectivity response.

#### References

- [1] Cooper, B. R., Elliott, R., Nettel, S., & Suhl, H. Theory of magnetic resonance in the heavy rare-earth metals. *Physical Review* **127**, 57 (1962).
- [2] Cooper, B. R. & Elliott, R. J. Spin-wave theory of magnetic resonance in spiral spin structures: Effect of an applied field. *Phys. Rev.* **131**, 1043–1056 (1963).
- [3] Turov, E. A., Tybulewicz, A., Chomet, S., & Technica, S. *Physical properties of magnetically ordered crystals*. Academic Press (1965).
- [4] Iida, R. *et al.* Spectral dependence of photoinduced spin precession in DyFeO<sub>3</sub>. *Phys. Rev. B* **84**, 064402 (2011).
- [5] Nandi, S. *et al.* Coexistence of superconductivity and ferromagnetism in P-doped EuFe<sub>2</sub>As<sub>2</sub>. *Phys. Rev. B* **89**, 014512 (2014).
